# Supplementary material for: Les Pana : une chefferie sacrée en République Centrafricaine
Source: Oxford University Press journal article supplement (doi:10.1242/jcs.260112), 1998-01-01
Supplement: jcs260112supp.pdf [file jcs260112supp.pdf]

**Table S1. List of SNARE PTMs identified in high-throughput datasets.**

PTM information as displayed by PhosphoSitePlus (Hornbeck et al., 2015). The number of high-throughput datasets in which each modification is found is shown in parentheses [minimum of three unless functional relevance has been published, as indicated by the associated PubMed ID (PMID)].

[Click here to download Table S1](#)
